# Supplementary material for: Shrub Cover and Soil Moisture Affect Taxus baccata L. Regeneration at Its Southern Range
Source: MDPI journal article supplement (doi:10.3390/plants12091819), 2023-04-28
Supplement: s1 [file s1]

**Table S2.** Variables used in this study and their values. nAT= number of adult trees; Dmax= maximum DBH; Daver= average DBH; Fem= female yews; Male= male yews; Sap= saplings; Seed = seedlings; Pend= declivity; Area=area of yew stands; Ssmo=soil summer moisture; Clos= closure of the canopy; Lay= layers of the canopy; Shr= shrubs; Spi= spiny shrubs; BroL= browsing by livestock; BroW= browsing by wild animals; BroT= total browsing.

| code | Area | nAT | Dmax | Daver | Fem | Male | Sap | Seed | Pend | Ssmo | Lay | Clos | Shr | Spi | ShrT | BroL | BroW | BroT |
|------|------|-----|------|-------|-----|------|-----|------|------|------|-----|------|-----|-----|------|------|------|------|
| 1    | 2.5  | 58  | 1840 | 1304  | 11  | 16   | 0   | 0    | 30   | Yes  | 2   | 60   | 0   | 1   | 1    | Yes  | Yes  | Yes  |
| 2    | 1    | 32  | 1750 | 905   | 15  | 16   | 3   | 2    | 21   | Yes  | 2   | 50   | 3   | 2   | 3    | Yes  | Yes  | Yes  |
| 3    | 1.2  | 30  | 2000 | 900   | 12  | 18   | 0   | 0    | 12.5 | Yes  | 2   | 75   | 0   | 1   | 1    | Yes  | Yes  | Yes  |
| 4    | 0.6  | 16  | 1000 | 745   | 6   | 10   | 1   | 0    | 22.5 | No   | 1   | 50   | 1   | 0   | 1    | Yes  | Yes  | Yes  |
| 5    | 0.5  | 23  | 1750 | 700   | 5   | 8    | 0   | 0    | 15   | Yes  | 2   | 60   | 1   | 1   | 1    | Yes  | Yes  | Yes  |
| 6    | 0.5  | 23  | 1050 | 682   | 8   | 15   | 0   | 0    | 24   | No   | 1   | 50   | 2   | 0   | 1    | Yes  | Yes  | Yes  |
| 7    | 3.2  | 181 | 1650 | 658   | 47  | 55   | 0   | 0    | 20   | Yes  | 2   | 80   | 0   | 2   | 1    | No   | No   | No   |
| 8    | 1    | 21  | 1500 | 650   | 6   | 13   | 0   | 0    | 15   | Yes  | 1   | 75   | 0   | 0   | 0    | Yes  | Yes  | Yes  |
| 9    | 7.5  | 182 | 1080 | 636   | 69  | 63   | 0   | 0    | 20   | Yes  | 1   | 55   | 0   | 0   | 0    | Yes  | Yes  | Yes  |
| 10   | 0.8  | 15  | 1500 | 557   | 5   | 10   | 2   | 2    | 7.5  | No   | 2   | 50   | 3   | 2   | 3    | Yes  | Yes  | Yes  |
| 11   | 0.6  | 21  | 1210 | 534   | 9   | 12   | 3   | 2    | 5    | No   | 1   | 80   | 1   | 3   | 2    | Yes  | Yes  | Yes  |
| 12   | 1.2  | 78  | 800  | 523   | 17  | 12   | 2   | 3    | 30   | No   | 1   | 65   | 2   | 2   | 2    | Yes  | Yes  | Yes  |
| 13   | 3    | 24  | 1300 | 520   | 9   | 15   | 2   | 0    | 20   | No   | 2   | 70   | 0   | 2   | 1    | Yes  | Yes  | Yes  |
| 14   | 0.5  | 36  | 1200 | 500   | 8   | 15   | 2   | 0    | 20   | Yes  | 3   | 80   | 1   | 2   | 2    | No   | No   | No   |
| 15   | 0.4  | 17  | 1200 | 490   | 3   | 14   | 0   | 0    | 30   | Yes  | 1   | 80   | 0   | 0   | 0    | No   | Yes  | Yes  |
| 16   | 1    | 31  | 790  | 488   | 13  | 11   | 2   | 0    | 42.5 | No   | 1   | 60   | 3   | 1   | 2    | Yes  | Yes  | Yes  |
| 17   | 0.5  | 42  | 820  | 425   | 21  | 19   | 0   | 0    | 35   | No   | 1   | 70   | 0   | 1   | 1    | Yes  | Yes  | Yes  |
| 18   | 3.5  | 52  | 1220 | 404   | 26  | 21   | 3   | 2    | 42.5 | No   | 2   | 60   | 5   | 3   | 4    | No   | No   | No   |
| 19   | 4.3  | 158 | 1224 | 384   | 45  | 69   | 0   | 0    | 45   | No   | 1   | 60   | 0   | 1   | 1    | No   | Yes  | Yes  |
| 20   | 6.6  | 836 | 1690 | 352   | 263 | 573  | 0   | 0    | 11   | Yes  | 1   | 90   | 0   | 2   | 1    | Yes  | No   | Yes  |
| 21   | 1.5  | 48  | 840  | 350   | 18  | 29   | 1   | 0    | 35   | No   | 1   | 90   | 0   | 1   | 1    | Yes  | Yes  | Yes  |
| 22   | 1.2  | 58  | 570  | 345   | 19  | 30   | 0   | 0    | 10   | No   | 1   | 75   | 0   | 0   | 0    | Yes  | Yes  | Yes  |
| 23   | 0.8  | 23  | 780  | 321   | 9   | 14   | 1   | 0    | 40   | Yes  | 1   | 90   | 1   | 1   | 1    | No   | Yes  | Yes  |
| 24   | 0.5  | 25  | 790  | 317   | 12  | 13   | 2   | 0    | 25   | Yes  | 2   | 85   | 3   | 3   | 3    | Yes  | Yes  | Yes  |
| 25   | 3    | 93  | 1110 | 314   | 30  | 43   | 3   | 0    | 12.5 | Yes  | 2   | 80   | 2   | 2   | 2    | Yes  | No   | Yes  |
| 26   | 1    | 19  | 640  | 302   | 8   | 8    | 2   | 2    | 3.5  | Yes  | 2   | 70   | 3   | 3   | 3    | No   | No   | No   |
| 27   | 4    | 57  | 650  | 300   | 23  | 27   | 2   | 0    | 30   | No   | 1   | 90   | 2   | 2   | 2    | Yes  | Yes  | Yes  |
| 28   | 3    | 77  | 1005 | 289   | 27  | 32   | 4   | 2    | 40   | Yes  | 3   | 70   | 4   | 3   | 4    | No   | No   | No   |
| 29   | 7.8  | 45  | 1120 | 281   | 19  | 21   | 0   | 0    | 2.5  | No   | 2   | 85   | 0   | 1   | 1    | Yes  | No   | Yes  |
| 30   | 0.4  | 17  | 570  | 267   | 7   | 10   | 0   | 0    | 30   | Yes  | 2   | 90   | 1   | 2   | 2    | No   | Yes  | Yes  |
| 31   | 2.5  | 54  | 500  | 236   | 12  | 11   | 5   | 3    | 30   | Yes  | 3   | 85   | 2   | 4   | 3    | No   | No   | No   |
| 32   | 0.5  | 11  | 460  | 224   | 1   | 3    | 0   | 0    | 45   | No   | 1   | 70   | 0   | 0   | 0    | No   | Yes  | Yes  |
| 33   | 10   | 198 | 650  | 215   | 58  | 71   | 4   | 3    | 23.5 | Yes  | 2   | 80   | 3   | 2   | 3    | No   | Yes  | Yes  |
| 34   | 4.5  | 103 | 400  | 210   | 42  | 43   | 3   | 3    | 5    | Yes  | 1   | 75   | 2   | 3   | 3    | Yes  | Yes  | Yes  |
| 35   | 1.5  | 35  | 900  | 183   | 18  | 11   | 3   | 3    | 22.5 | Yes  | 2   | 85   | 2   | 4   | 3    | No   | No   | No   |
| 36   | 5    | 115 | 560  | 182   | 34  | 29   | 4   | 2    | 20   | Yes  | 3   | 80   | 3   | 3   | 3    | No   | No   | No   |
| 37   | 7.8  | 135 | 950  | 180   | 62  | 35   | 4   | 2    | 27.5 | Yes  | 3   | 80   | 3   | 5   | 4    | No   | No   | No   |
| 38   | 2    | 26  | 380  | 151   | 7   | 6    | 3   | 0    | 20   | Yes  | 2   | 85   | 2   | 3   | 3    | No   | Yes  | Yes  |
| 39   | 3    | 368 | 930  | 145   | 143 | 166  | 5   | 4    | 34   | Yes  | 2   | 55   | 4   | 4   | 4    | No   | No   | No   |
| 40   | 4.5  | 293 | 660  | 138   | 126 | 114  | 5   | 4    | 22.5 | Yes  | 2   | 85   | 2   | 4   | 3    | No   | No   | No   |
