# Supplementary material for: Shrub Cover and Soil Moisture Affect Taxus baccata L. Regeneration at Its Southern Range
Source: MDPI journal article supplement (doi:10.3390/plants12091819), 2023-04-28
Supplement: s1 [file s1]

**Table S1.** List of the studied sites, their location, coordinates (Coord.), lithology (Bas = basalts; Gra = granitoids; Grd = granodiorites; Lim = Limestones; Met = metamorphic rocks), elevation (Elev.), and number of plots for searching recruitment. In the column Plots, the statement “all” means that all the site has been checked.

| code | Zone             | Locality                            | Municipality             | Coord.<br>X | Coord.<br>Y | Litholog<br>y | Elev. (m<br>a.s.l.) | Plots |
|------|------------------|-------------------------------------|--------------------------|-------------|-------------|---------------|---------------------|-------|
| 1    | Gennargentu      | Rio Aratu<br>(Cuile S'Arena)        | Desulo                   | 4429965.68  | 524514.86   | Met           | 1000-1500           | 2     |
| 2    | Gennargentu      | Funtana S'Enis<br>(Riu Correboi)    | Fonni/Villagrande<br>S.  | 4434953.89  | 529090.74   | Grd           | 1220-1380           | 3     |
| 3    | Gennargentu      | Cuile Mattarano                     | Arzana                   | 4423401.94  | 530028.84   | Grd           | 1080-1100           | all   |
| 4    | Supr. Ba. Ur.    | Su Clovu                            | Baunei                   | 4440926.51  | 549738.75   | Lim           | 800-815             | all   |
| 5    | Gennargentu      | Bacu Searthu<br>(Rio Is Enis)       | Villagrande<br>Srisaili  | 4428453.29  | 528739.61   | Met           | 1200-1250           | all   |
| 6    | Supr. Ba. Ur.    | Bacu Addas                          | Baunei                   | 4443448.22  | 550511.05   | Lim           | 575-815             | 2     |
| 7    | Marghine         | Mularza Noa                         | Bolotana                 | 4467473.85  | 492382.21   | Bas           | 925-975             | 4     |
| 8    | Gennargentu      | Bacu Sa Mandara                     | Villagrande<br>Srisaili  | 4434900.87  | 534512.49   | Met           | 1100-1300           | all   |
| 9    | Gennargentu      | Fun. Ortu is Arangios               | Desulo/Arzana            | 4426807.76  | 527057.69   | Gra           | 1450-1650           | 4     |
| 10   | Supr. Ba. Ur.    | S'Eni Pidargiu                      | Baunei                   | 4441941.45  | 549299.43   | Lim           | 880-900             | all   |
| 11   | Supr. Ba. Ur.    | Gorropeddu                          | Baunei/Urzulei           | 4444073.28  | 548113.99   | Lim           | 770-790             | all   |
| 12   | Supr. Ol. Or. Ur | M. Novo S. Giovanni                 | Orgosolo                 | 4441061.81  | 535337.22   | Lim           | 1150-1250           | 2     |
| 13   | Supr. Ol. Or. Ur | Riu S'Eni                           | Orgosolo                 | 4441083.20  | 537149.01   | Lim           | 880-1000            | all   |
| 14   | Ogliastra        | Baccu Is Enis                       | Villagrande<br>Srisaili  | 4425022.46  | 540808.37   | Met           | 900-1000            | all   |
| 15   | Catena del Linas | Canali 'e Nesta                     | Gonnosfanadiga           | 4366499.67  | 467928.70   | Gra           | 875-925             | all   |
| 16   | Supr. Ol. Or. Ur | Monte Fumai                         | Orgosolo                 | 4439778.13  | 534058.66   | Lim           | 1135-1285           | 2     |
| 17   | Montalbo Lula    | Sa Marmurata                        | Lula                     | 4480001.45  | 544856.07   | Lim           | 730-770             | all   |
| 18   | Limbara          | P. Berritta<br>(Valle Suprappare)   | Berchidda                | 4521812.33  | 514725.33   | Gra           | 1100-1350           | 3     |
| 19   | Supr. Ol. Or. Ur | Su Suercone                         | Orgosolo                 | 4450898.69  | 540725.44   | Bas           | 690-850             | 3     |
| 20   | Goceano          | Sos Nibberos                        | Bono                     | 4474704.18  | 499667.91   | Met           | 950-1100            | 5     |
| 21   | Montalbo Lula    | S'Ortu 'e Trullio                   | Lula                     | 4479573.54  | 544357.29   | Lim           | 850-920             | all   |
| 22   | Ogliastra        | Su Candelassargiu                   | Gairo                    | 4413262.05  | 539209.76   | Lim           | 950-1020            | 3     |
| 23   | Monti del Sulcis | Canale Longufresu                   | Uta                      | 4333134.82  | 486580.45   | Gra           | 815-900             | all   |
| 24   | M. di Alà        | Ferulas<br>(Tassu Mannu)            | Alà dei Sardi            | 4505089.50  | 524355.92   | Gra           | 930-1010            | all   |
| 25   | Barbagia Seulo   | Rio Longufresu<br>(Stampu Turrunu)  | Seulo/Sadali             | 4411121.58  | 522656.55   | Lim           | 750-900             | 4     |
| 26   | Ogliastra        | Rio Taquisara                       | Gairo/Ussassai           | 4410059.66  | 538644.05   | Lim           | 720-750             | all   |
| 27   | Montalbo Lula    | Su Renagliu                         | Lula                     | 4479336.81  | 544107.03   | Lim           | 850-1010            | all   |
| 28   | M. Nieddu Gal.   | S'Inferu                            | San Teodoro              | 4509821.26  | 548552.41   | Gra           | 470-600             | all   |
| 29   | Marghine         | Rio Biralotta                       | Bolotana                 | 4467122.61  | 492323.45   | Bas           | 1000-1020           | 3     |
| 30   | Lerno            | Rodè                                | Pattada                  | 4495729.55  | 513584.56   | Gra           | 850-900             | all   |
| 31   | M. Nieddu Gal.   | Rio Badde Niedda                    | Padru                    | 4512162.56  | 548449.86   | Gra           | 270-500             | 2     |
| 32   | Monti del Sulcis | Canale Longuvresu                   | Pula                     | 4320046.36  | 490859.66   | Gra           | 535-555             | all   |
| 33   | Ogliastra        | Rio Ermolinus                       | Seui                     | 4413476.21  | 533629.79   | Lim           | 800-1100            | 5     |
| 34   | Goceano          | Funtana Tassu<br>(Nuraghe Su Tassu) | Bultei                   | 4484445.08  | 505586.34   | Met           | 940-980             | 4     |
| 35   | Limbara          | Riu di Li Tassi                     | Tempio                   | 4519283.38  | 504768.00   | Gra           | 530-610             | all   |
| 36   | Sarcidano        | Funtana Mela<br>(Rio Bau Onu)       | Laconi                   | 4413936.19  | 508007.54   | Lim           | 650-750             | 5     |
| 37   | Limbara          | Rio Rizzolu 'e<br>Curadore          | Oschiri/Tempio           | 4520055.63  | 507713.74   | Met           | 430-630             | 5     |
| 38   | Montiferru       | Rio S'Abba Lughida                  | Cuglieri/S.<br>Lussurgiu | 4445650.43  | 467208.66   | Bas           | 850-890             | 3     |
| 39   | Limbara          | P. Bandera NW<br>(Funtana Bandera)  | Tempio/Calangian<br>us   | 4522636.70  | 515748.78   | Gra           | 1200-1330           | 5     |
| 40   | Limbara          | Ghjrioni<br>(M. Niiddoni. NE)       | Calangianus              | 4524101.23  | 517679.64   | Gra           | 850-1000            | 5     |
